# Supplementary material for: In-Hospital Mortality Disparities Among American Indian and Alaska Native, Black, and White Patients With COVID-19
Source: PubMed Central journal article supplement (PMC8968465; doi:10.1001/jamanetworkopen.2022.4822), 2022-03-30
Supplement: jamanetwopen-e224822-s001.pdf [file jamanetwopen-e224822-s001.pdf]

## Supplementary Online Content

Musshafen LA, El-Sadek L, Lirette ST, Summers RL, Compretta C, Dobbs TE III. In-hospital mortality disparities among American Indian and Alaska Native, Black, and White patients with COVID-19. *JAMA Netw Open*. 2022;5(3):e224822.  
doi:10.1001/jamanetworkopen.2022.4822

**eTable.** Elixhauser Comorbidity Index (ECI) Risk Factors and Associated *ICD-10* Code(s)

This supplementary material has been provided by the authors to give readers additional information about their work.

| <b>eTable. Elixhauser Comorbidity Index (ECI) Risk Factors and Associated ICD-10 Code(s)</b> |                                                                                                                           |
|----------------------------------------------------------------------------------------------|---------------------------------------------------------------------------------------------------------------------------|
| <b>ECI Risk Factor</b>                                                                       | <b>Associated ICD-10 Code(s)</b>                                                                                          |
| AIDS/HIV                                                                                     | B20.x-B22.x, B24.x                                                                                                        |
| Alcohol abuse                                                                                | F10, E52, G62.1, I42.6, K29.2, K70.0, K70.3, K70.9, T51.x, Z50.2, Z71.4, Z72.1                                            |
| Blood loss anemia                                                                            | D50.0                                                                                                                     |
| Cardiac arrhythmias                                                                          | I44.1-I44.3, I45.6, I45.9, I47.x-I49.x, R00.0, R00.1, R00.8, T82.1, Z45.0, Z95.0                                          |
| Chronic pulmonary disease                                                                    | I27.8, I27.9, J40.x-J47.x, J60.x-J67.x, J68.4, J70.1, J70.3                                                               |
| Coagulopathy                                                                                 | D65-D68.x, D69.1, D69.3-D69.6                                                                                             |
| Congestive heart failure                                                                     | I09.9, I11.0, I13.0, I13.2, I25.5, I42.0, I42.5-I42.9, I43.x, I50.x, P29.0                                                |
| Deficiency anemia                                                                            | D50.8, D50.9, D51.x-D53.x                                                                                                 |
| Depression                                                                                   | F20.4, F31.3-F31.5, F32.x, F33.x, F34.1, F41.2, F43.2                                                                     |
| Diabetes, complicated                                                                        | E10.2-E10.8, E11.2-E11.8, E12.2-E12.8, E13.2-E13.8, E14.2-E14.8                                                           |
| Diabetes, uncomplicated                                                                      | E10.0, E10.1, E10.9, E11.0, E11.1, E11.9, E12.0, E12.1, E12.9, E13.0, E13.1, E13.9, E14.0, E14.1, E14.9                   |
| Drug abuse                                                                                   | F11.x-F16.x, F18.x, F19.x, Z71.5, Z72.2                                                                                   |
| Fluid and electrolyte disorders                                                              | E22.2, E86.x, E87.x                                                                                                       |
| Hypertension, complicated                                                                    | I11.x-I13.x, I15.x                                                                                                        |
| Hypertension, uncomplicated                                                                  | I10.x                                                                                                                     |
| Hypothyroidism                                                                               | E00.x-E03.x, E89.0                                                                                                        |
| Liver disease                                                                                | B18.x, I85.x, I86.4, I98.2, K70.x, K71.1, K71.3-K71.5, K71.7, K72.x-K74.x, K76.0, K76.2 - K76.9, Z94.4                    |
| Lymphoma                                                                                     | C81.x-C85.x, C88.x, C90.0, C90.2, C96.x,                                                                                  |
| Metastatic cancer                                                                            | C77.x-C80.x                                                                                                               |
| Obesity                                                                                      | E66.x                                                                                                                     |
| Other neurological disorders                                                                 | G10.x-G13.x, G20.x-G22.x, G25.4, G25.5, G31.2, G31.8, G31.9, G32.x, G35.x-G37.x, G40.x, G41.x, G93.1, G93.4, R47.0, R56.x |
| Paralysis                                                                                    | G04.1, G11.4, G80.1, G80.2, G81.x, G82.x, G83.0-G83.4, G83.9                                                              |
| Peptic ulcer disease, excluding bleeding                                                     | K25.7, K25.9, K26.7, K26.9, K27.7, K27.9, K28.7, K28.9                                                                    |
| Peripheral vascular disorders                                                                | I70.x, I71.x, I73.1, I73.8, I73.9, I77.1, I79.0, I79.2, K55.1, K55.8, K55.9, Z95.8, Z95.9                                 |
| Psychoses                                                                                    | F20.x, F22.x-F25.x, F28.x, F29.x, F30.2, F31.2, F31.5                                                                     |
| Pulmonary circulation disorders                                                              | I26.x, I27.x, I28.0, I28.8, I28.9                                                                                         |
| Renal failure                                                                                | I12.0, I13.1, N18.x, N19.x, N25.0, Z49.0-Z49.2, Z94.0, Z99.2                                                              |
| Rheumatoid arthritis/collagen vascular diseases                                              | L94.0, L94.1, L94.3, M05.x, M06.x, M08.x, M12.0, M12.3, M30.x, M31.0-M31.3, M32.x-M35.x, M45.x, M46.1, M46.8, M46.9       |
| Solid tumor without metastasis                                                               | C00.x-C26.x, C30.x-C34.x, C37.x-C41.x, C43.x, C45.x-C58.x, C60.x-C76.x, C97.x                                             |
| Valvular disease                                                                             | A52.0, I05.x - I08.x, I09.1, I09.8, I34.x-I39.x, Q23.0-Q23.3, Z95.2-Z95.4                                                 |
| Weight loss                                                                                  | E40.x-E46.x, R63.4, R64                                                                                                   |
